# Supplementary material for: Overcoming High Impedance in the Transitional Area of the Distal Great Cardiac Vein during Radiofrequency Catheter Ablation of Ventricular Arrhythmia
Source: MDPI journal article supplement (doi:10.3390/jcdd9080264), 2022-08-12
Supplement: s1 [file s1]

**Supplementary Table S1. patient characteristics.**

|                                               | <b>Patients (n = 156)</b> |
|-----------------------------------------------|---------------------------|
| Sex(Male %)                                   | 96(61.53%)                |
| Age(year)                                     | 57.22±15.68               |
| Total number of PVCs<br>(times/24h) #         | 22472±9647                |
| Course of disease (year)                      | 2.83±1.96                 |
| Complicated<br>with hypertension              | 18(11.54%)                |
| LVEDd(mm)                                     | 48.33±5.82                |
| LVEF (%)                                      | 65.72±5.88                |
| Complicated with left ventricular hypertrophy | 23(14.74%)                |
| NSVT                                          | 25(16.03%)                |
| SVT                                           | 11(7.05%)                 |
| PVCs                                          | 110(70.51%)               |

#Dynamic electrocardiogram was performed in 144 cases. PVC indicates premature ventricular contraction; LVEF, left ventricular ejection fraction; LVEDd, left ventricular end-diastolic dimension; NSVT, non-sustained ventricular tachycardia; SVT, sustained ventricular tachycardia.

**Supplementary Table S2. the characteristics of mapping and ablation.**

|                                 | <b>Patients (n=149)</b> |
|---------------------------------|-------------------------|
| V-QRS (ms)                      | -34.96±4.82             |
| Ventricular capture<br>(case,%) | 132(88.59%)             |
| Pace march leads                | 11.38±1.28              |
| Procedure time(min)             | 62.58±11.23             |
| Operation in CS (min)           | 25.91±4.53              |
| RF duration (s)                 | 146.28±47.03            |
| No. of RF lesions               | 1.72±0.63               |
| Fluoroscopy time (min)          | 8.62±3.86               |

**Supplementary Table S3. Details of cases who experienced complications.**

| <b>Patients</b> | <b>Complication</b>                                  | <b>Age,<br/>year</b> | <b>Sex</b> | <b>Origin</b> | <b>Power, W</b> | <b>Upper limit<br/>impedance,Ω</b> | <b>Saline flow<br/>rates, ml/min</b> | <b>Upper limit<br/>temperature, °C</b> |
|-----------------|------------------------------------------------------|----------------------|------------|---------------|-----------------|------------------------------------|--------------------------------------|----------------------------------------|
| 1               | Transient contrast staining                          | 62                   | F          | DGCV1         | 30              | 300                                | 40                                   | 43                                     |
| 2               | Transient contrast staining                          | 54                   | M          | DGCV1         | 25              | 300                                | 40                                   | 43                                     |
| 3               | Transient contrast staining                          | 55                   | F          | DGCV1         | 30              | 300                                | 60                                   | 43                                     |
| 4               | Transient contrast staining                          | 62                   | F          | DGCV2         | 30              | 300                                | 60                                   | 43                                     |
| 5               | Transient contrast staining                          | 34                   | F          | Summit-CV     | 45              | Turn off                           | 60                                   | 45                                     |
| 6               | Persistent contrast staining                         | 65                   | M          | DGCV2         | 25              | 300                                | 60                                   | 43                                     |
| 7               | Persistent contrast staining                         | 70                   | M          | DGCV2         | 35              | 300                                | 60                                   | 43                                     |
| 8               | Persistent contrast staining                         | 46                   | M          | AIV           | 25              | 300                                | 60                                   | 43                                     |
| 9               | Persistent contrast staining                         | 69                   | F          | AIV           | 30              | Turn off                           | 120                                  | 43                                     |
| 10              | Persistent contrast staining                         | 82                   | M          | Summit-CV     | 25              | 300                                | 60                                   | 43                                     |
| 11              | Coronary vein rupture/<br>Acute pericardial effusion | 71                   | F          | DGCV1         | 30              | 300                                | 60                                   | 43                                     |
| 12              | Coronary vein rupture/<br>Acute pericardial effusion | 81                   | M          | AIV           | 25              | 300                                | 60                                   | 43                                     |
| 13              | Delayed pericardial effusion                         | 56                   | F          | Summit-CV     | 25              | 300                                | 60                                   | 43                                     |
| 14              | Coronary artery injury                               | 46                   | M          | DGCV2         | 30              | 300                                | 60                                   | 43                                     |
| 15              | Coronary artery injury/<br>Coronary artery spasm     | 38                   | M          | DGCV2         | 35              | 300                                | 60                                   | 43                                     |
| 16              | Coronary artery injury/<br>Coronary artery spasm     | 44                   | F          | AIV           | 25              | 300                                | 60                                   | 43                                     |

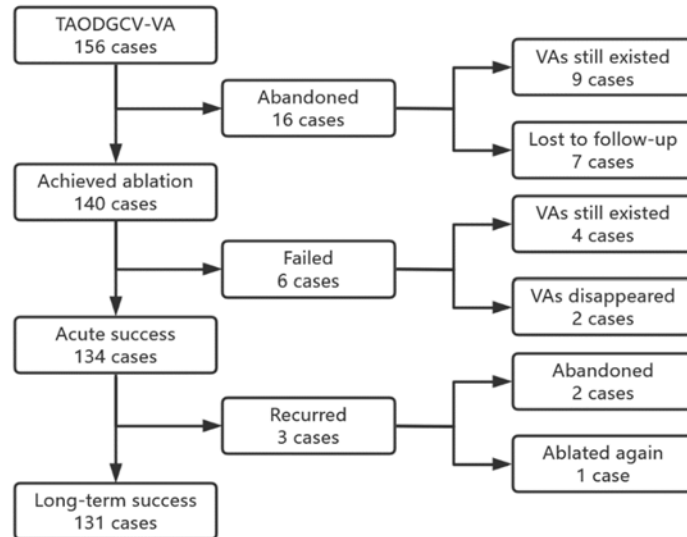

**Supplementary Figure S1. Follow-up outcomes of all 156 patients.**

TAODGCV = Transitional area of the distal great cardiac vein; VA = Ventricular arrhythmia. Achieve ablation was defined as energy release reaching 20–25 W and lasting 30 seconds. Acute success was defined as ventricular arrhythmia no longer being induced by electrical stimulation or intravenous infusion of isoproterenol after ablation, and ventricular arrhythmia was eliminated within 24 hours postoperatively per electrocardiography monitoring. Long-term success was defined as premature ventricular contractions decreasing by more than 80% for three months after ablation, significantly improving symptoms. Recurrence was defined as premature ventricular contractions PVC burden decreasing by at least 80% of that of prior ablation for three months [15].

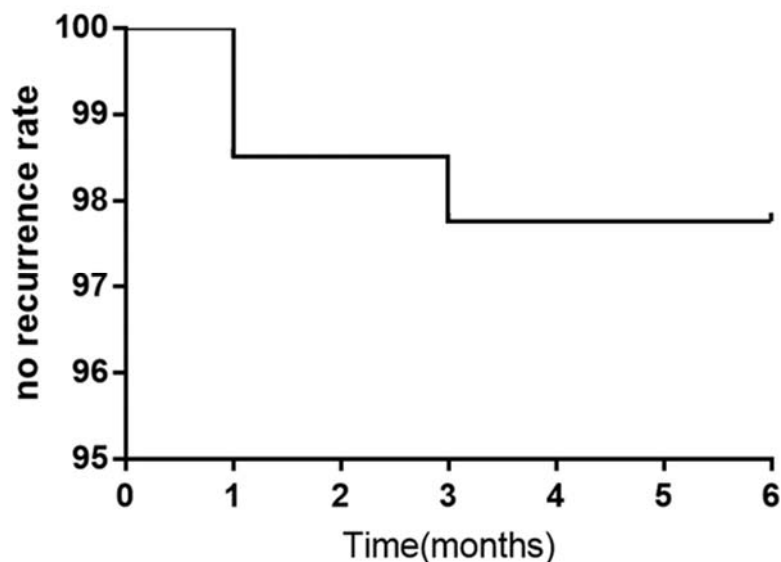

**Supplementary Figure S2. a Kaplan-Meier curve of patients who achieved acute success.**

All recurrences occurred within three months after ablation.
